# Supplementary material for: A Fluorescent detection method for copper ions based on a direct redox route and desk study of wax-printed paper-based probes
Source: Royal Society of Chemistry journal article supplement (doi:10.1039/c8ay00372f), 2018-01-01
Supplement: c8ay00372f1.pdf [file c8ay00372f1.pdf]

## **A Fluorescent Detection Method for Copper ions Based on Directly Redox Route and A Desk Study of Wax-printed Paper-based Probe**

Jiawei Li<sup>1,#</sup>, Pan Li<sup>1,#</sup>, Minghong Bian<sup>2</sup>, Danqun Huo<sup>2,\*</sup>, Changjun Hou<sup>1,\*</sup>, Hui Qin<sup>3</sup>, Suyi Zhang<sup>1,3</sup>, Liang Zhang<sup>1,4</sup>

<sup>1</sup>Key Laboratory for Biorheological Science and Technology of Ministry of Education, State and Local Joint Engineering Laboratory for Vascular Implants,

Bioengineering College of Chongqing University, Chongqing 400044, PR China

<sup>2</sup>Liquor Making Biology Technology and Application of Key Laboratory of Sichuan Province, College of Bioengineering, Sichuan University of Science and Engineering, Zigong, 643000, PR China

<sup>3</sup>National Engineering Research Center of Solid-State Brewing, Luzhou Laojiao Group Co. Ltd., Luzhou 646000, PR China

<sup>4</sup>LuzhouLaojiao Group Co., Ltd., Luzhou 646000, PR China

# These two authors made equal contribution to this work.

\* Corresponding author. Tel.: +86 23 6511 2673; fax: +86 23 6510 2507.

E-mail addresses: [houcj@cqu.edu.cn](mailto:houcj@cqu.edu.cn) (C. Hou)

[huodq23@163.com](mailto:huodq23@163.com) (D. Huo)

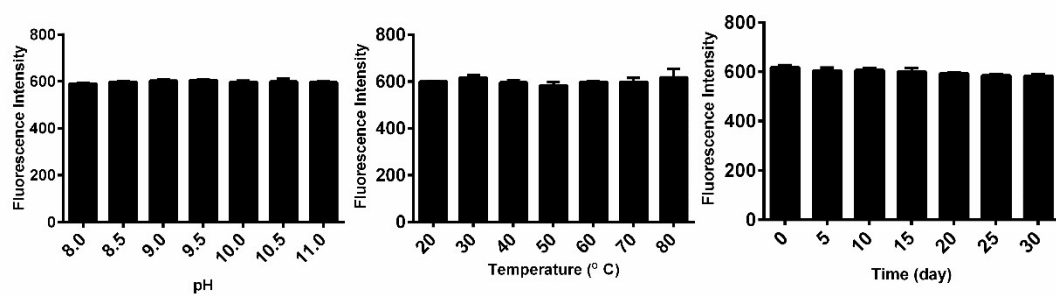

Fig.S1 The effects of high temperature, alkalescence conditions and long-term preservation on BSA-Au NCs

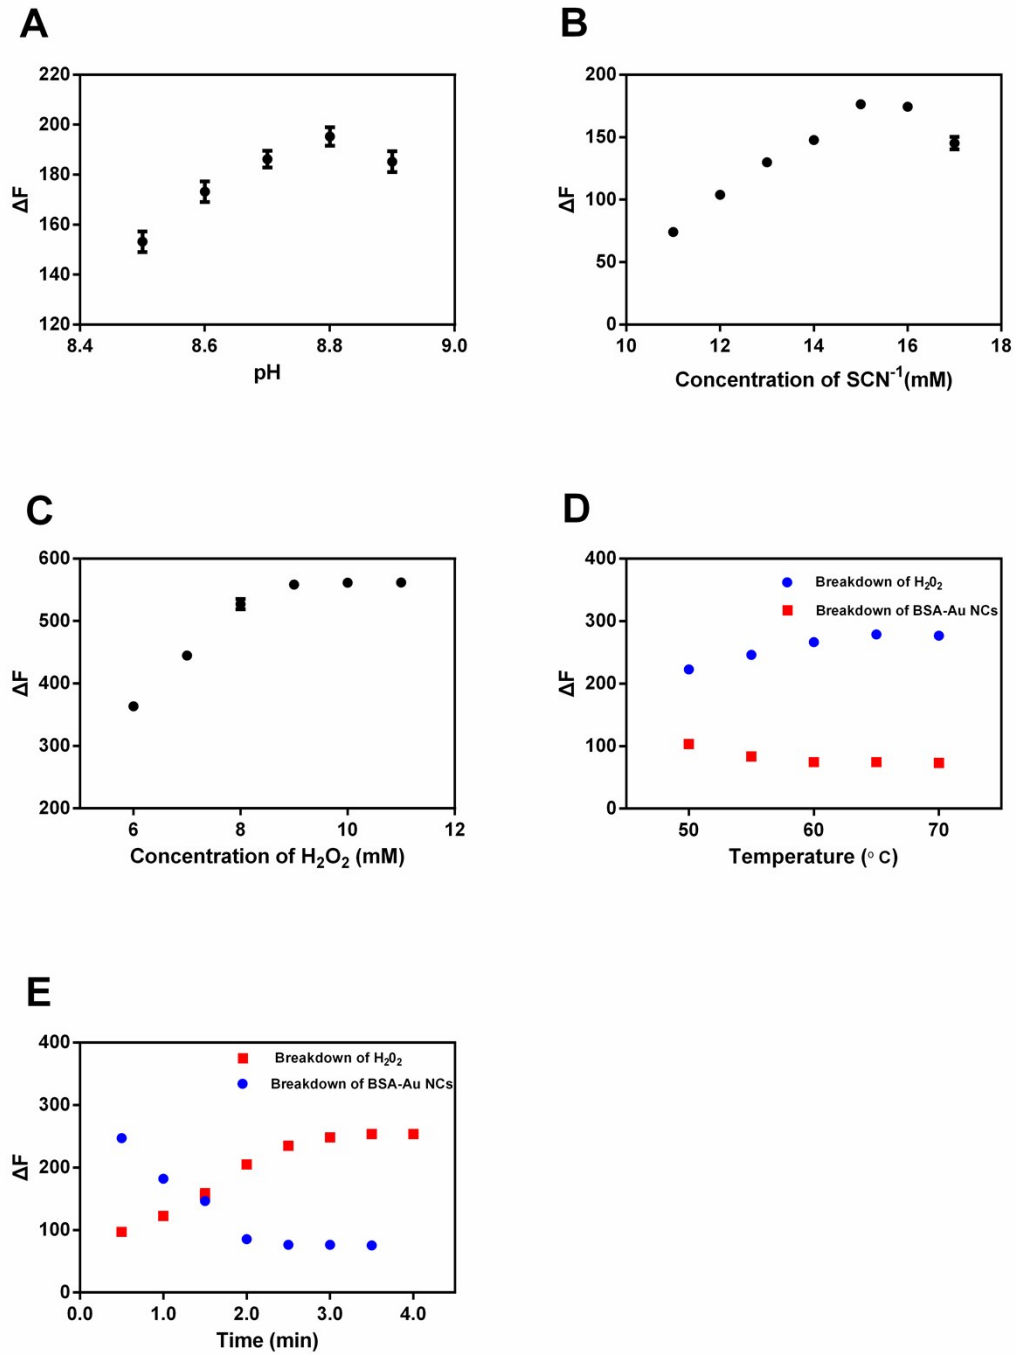

FigS2. Optimization of experimental conditions
